# Supplementary material
Source: ML conference proceedings conference paper supplement (https://openreview.net/forum?id=zuYXSoOzYG)

Log Mean MSE

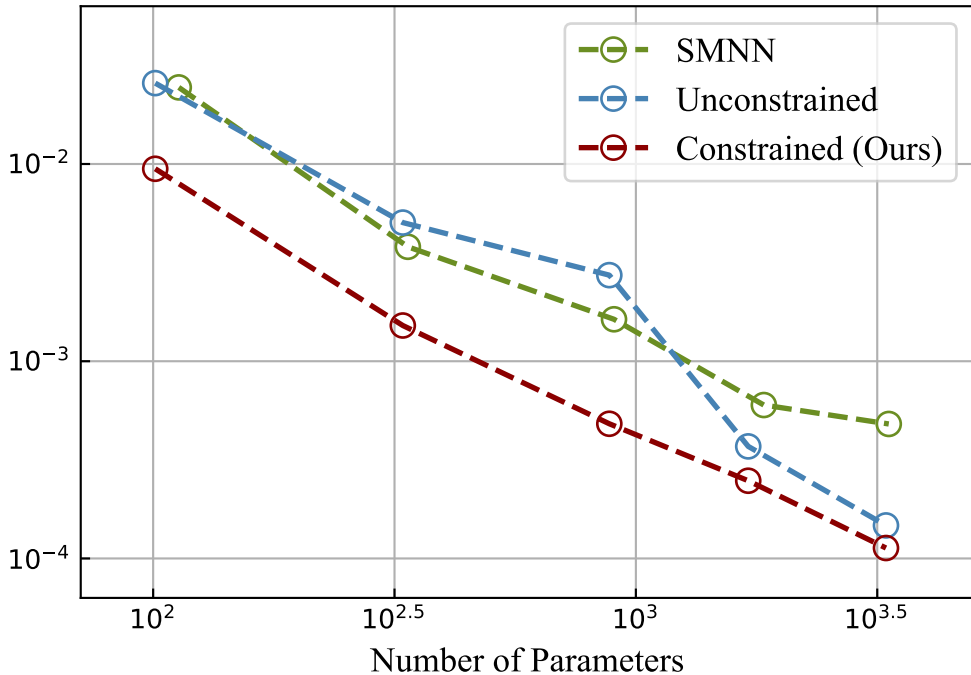

Supplement: supplementary_material [file compare_three.pdf › ShapingMonotone/2Dexample/figures/compare_three.pdf]

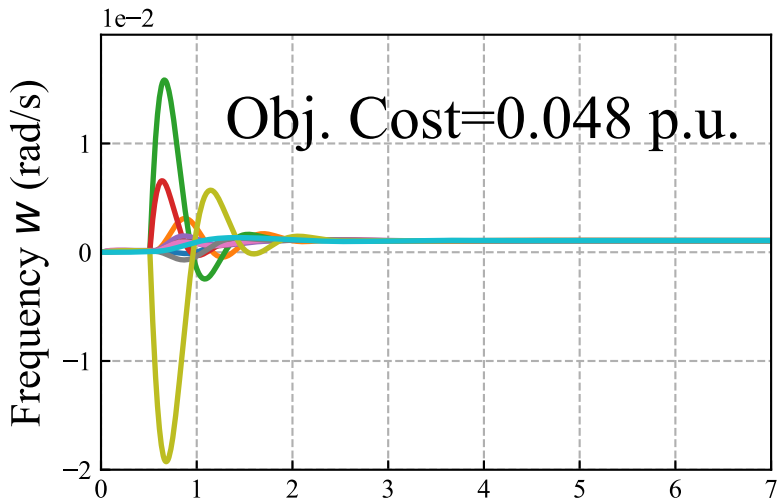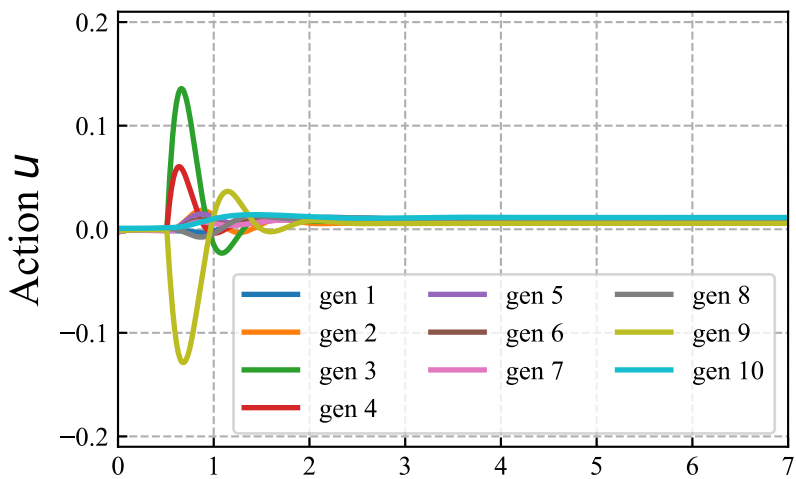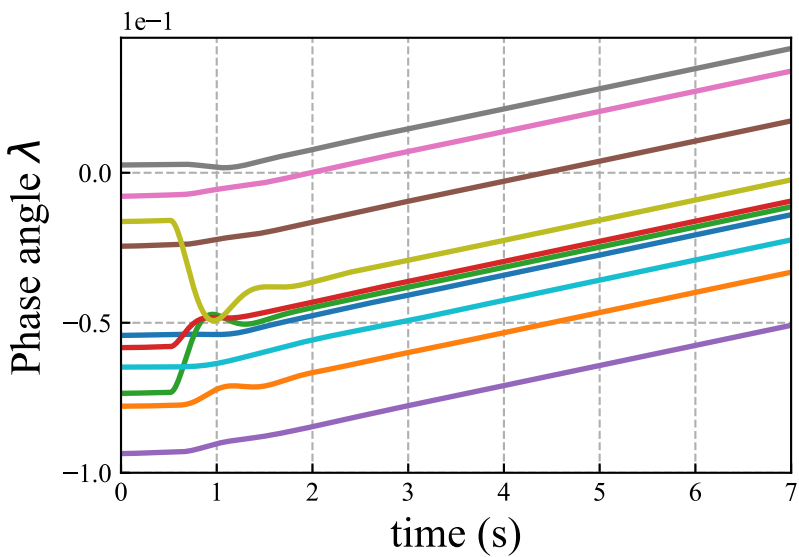

Supplement: supplementary_material [file action_frequency_SMNN.pdf › ShapingMonotone/frequencycontrol/figures/action_frequency_SMNN.pdf]

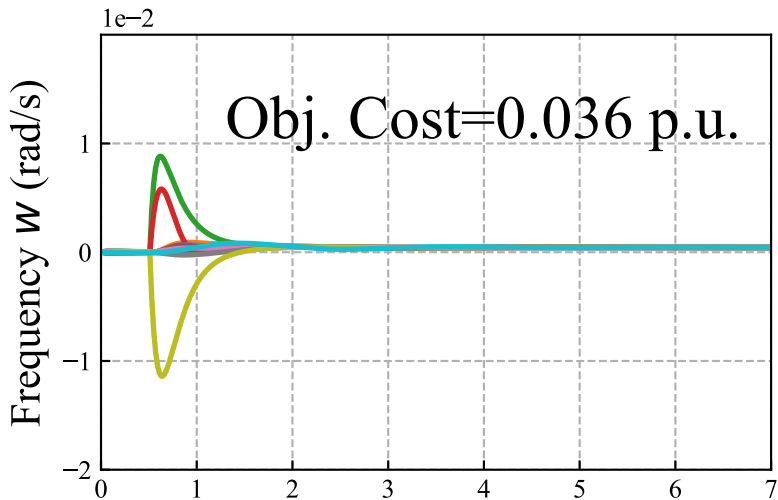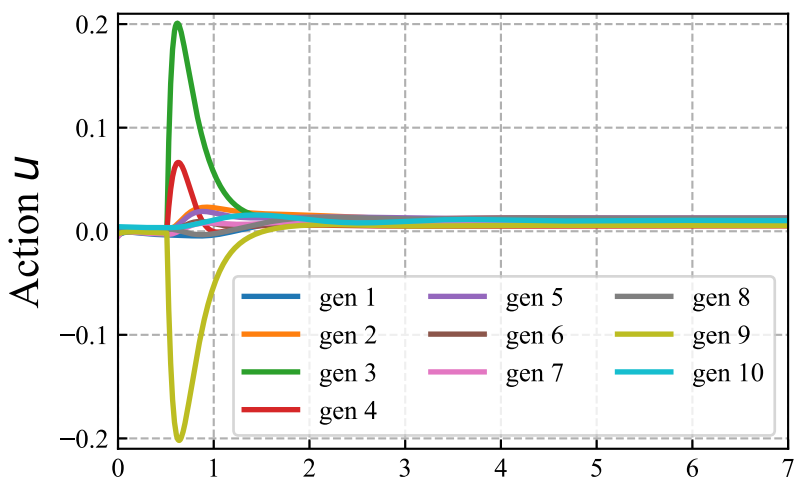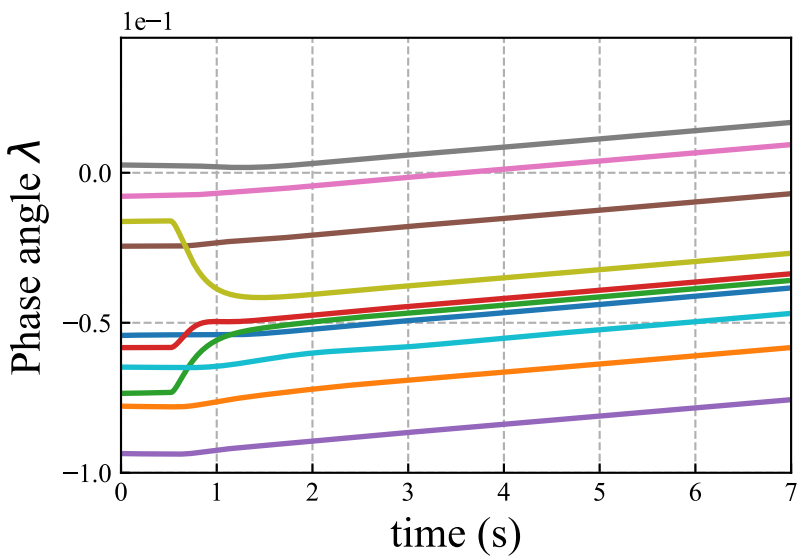

Supplement: supplementary_material [file action_frequency_constrained_learn.pdf › ShapingMonotone/frequencycontrol/figures/action_frequency_constrained_learn.pdf]

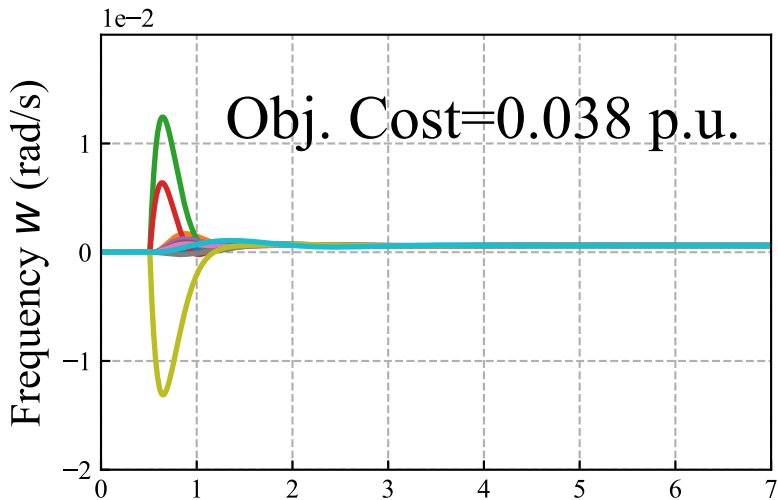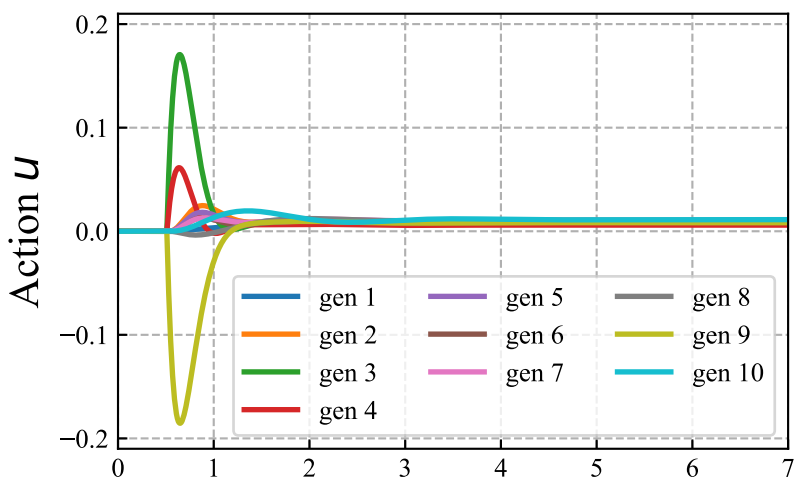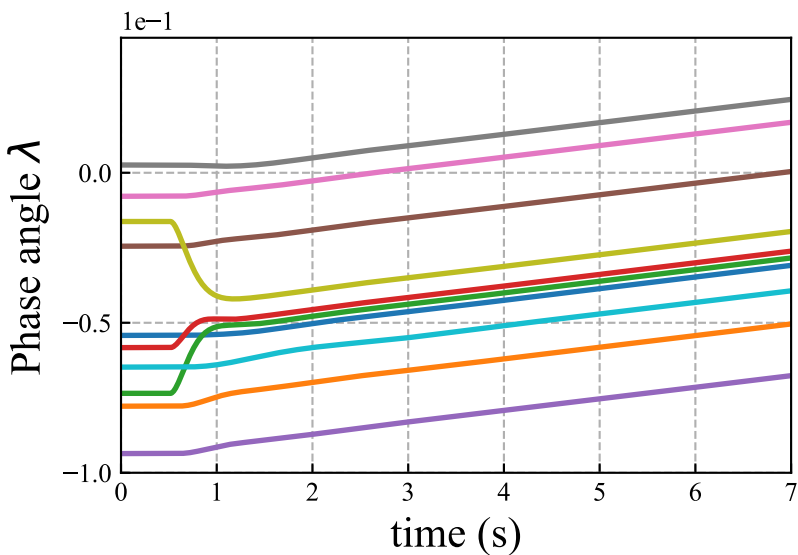

Supplement: supplementary_material [file action_frequency_one_layer.pdf › ShapingMonotone/frequencycontrol/figures/action_frequency_one_layer.pdf]

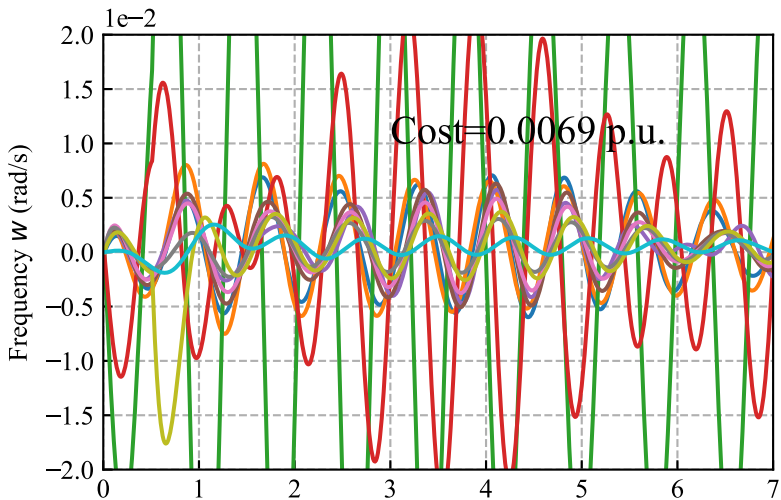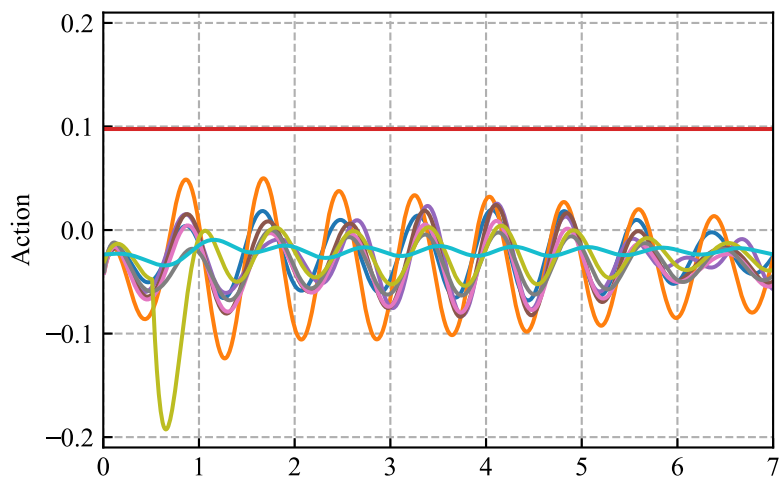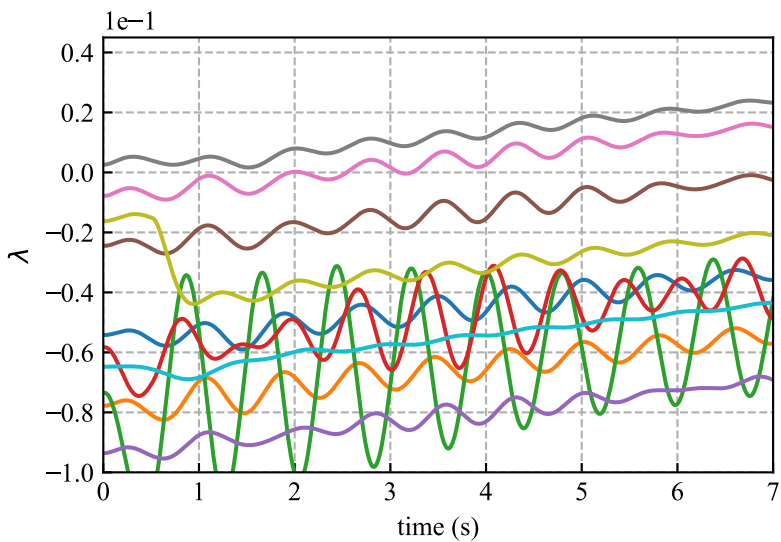

Supplement: supplementary_material [file action_unconstraiend.pdf › ShapingMonotone/frequencycontrol/figures/action_unconstraiend.pdf]

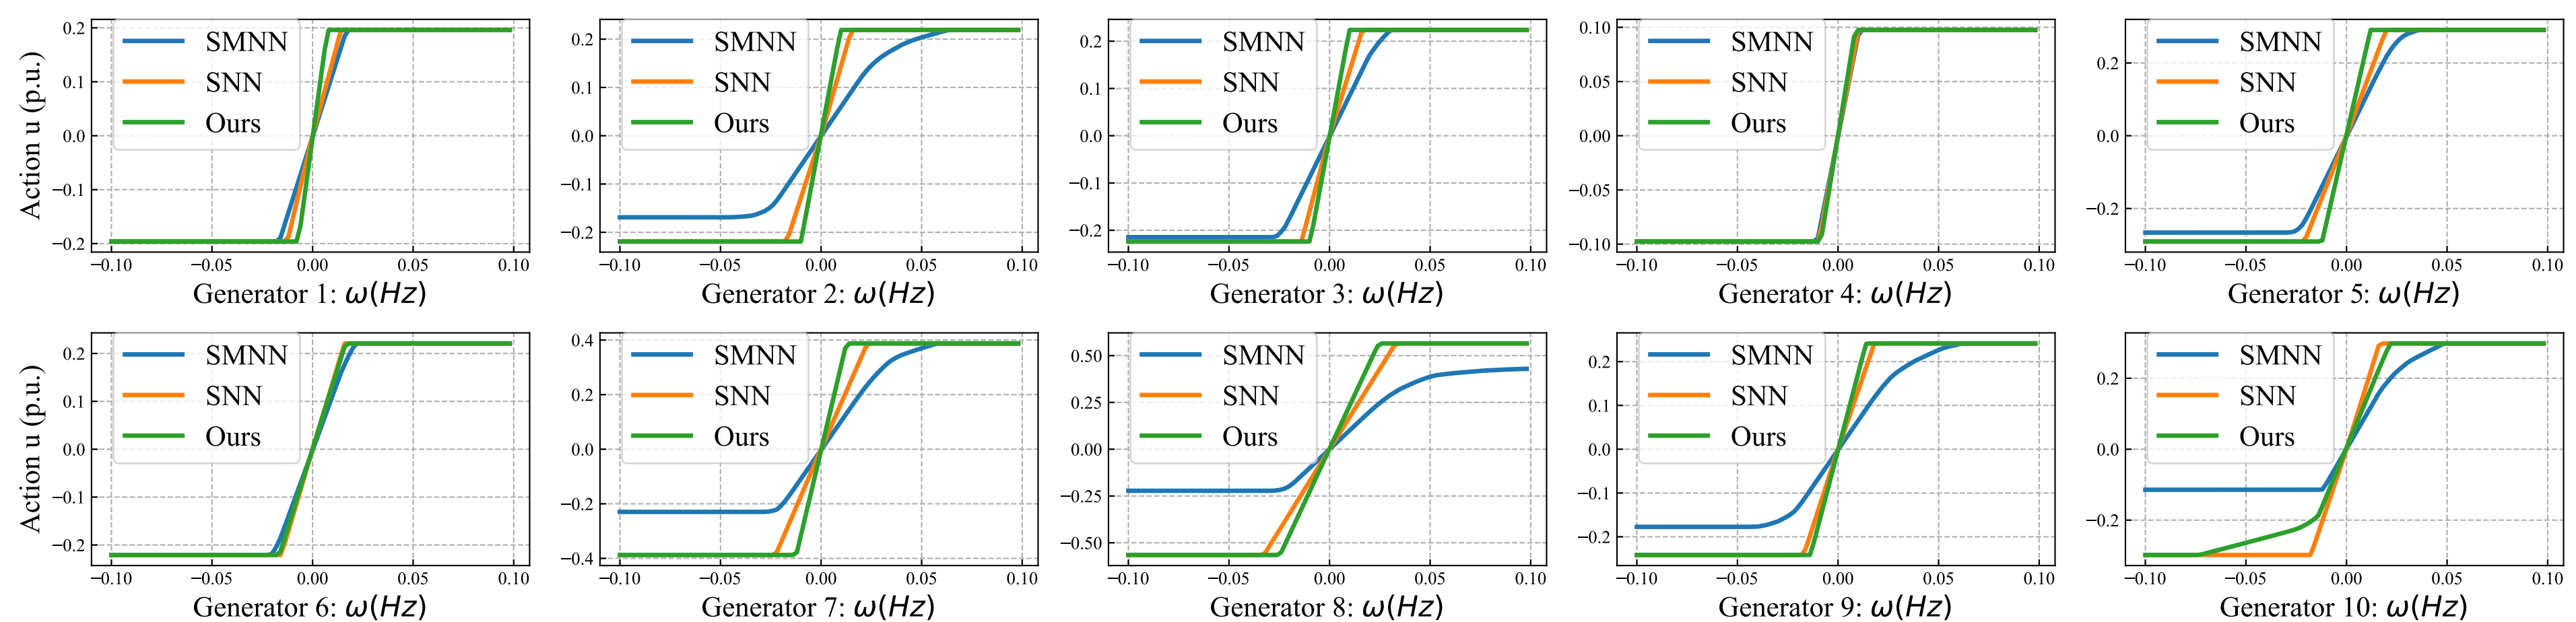

Supplement: supplementary_material [file compare_action.pdf › ShapingMonotone/frequencycontrol/figures/compare_action.pdf]
